# Supplementary material for: Investigating the Impact of HTNV Infection on the Gut Microbiota of Wild-Type and NLRX1 Knockout Mice
Source: Hindawi journal article supplement (doi:10.1155/2024/3992753), 2024-04-20
Supplement: f1 [file 3992753.f1.zip]

Archive with 2 entries (2 files):
- Supplementary Figure1a.pdf
- Supplementary Figure1b.pdf
