# Supplementary figures and images for: Investigating the Impact of HTNV Infection on the Gut Microbiota of Wild-Type and NLRX1 Knockout Mice
Source: Hindawi journal article supplement (doi:10.1155/2024/3992753), 2024-04-20

## Superclass of HMDB

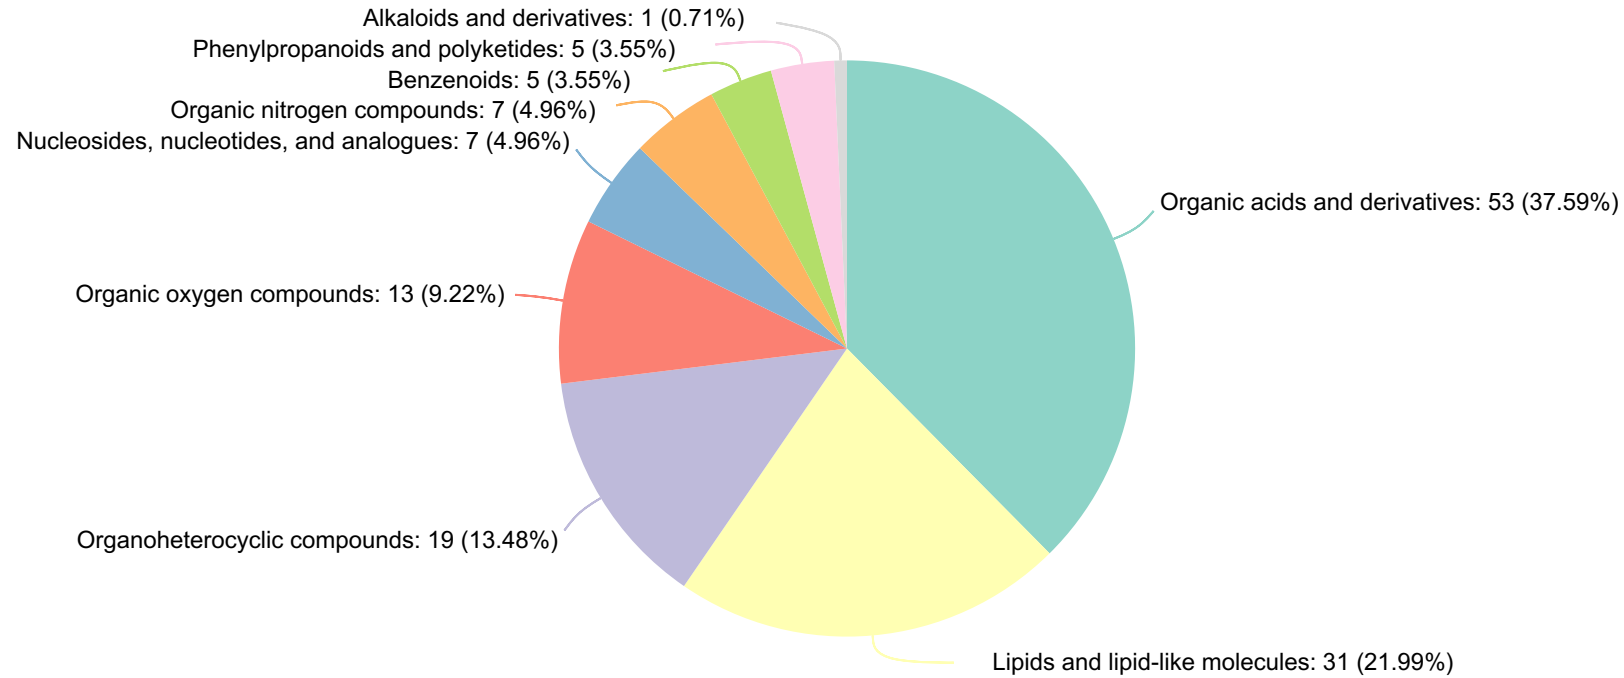

Supplement: f1 [file 3992753.f1.zip]

## subclass

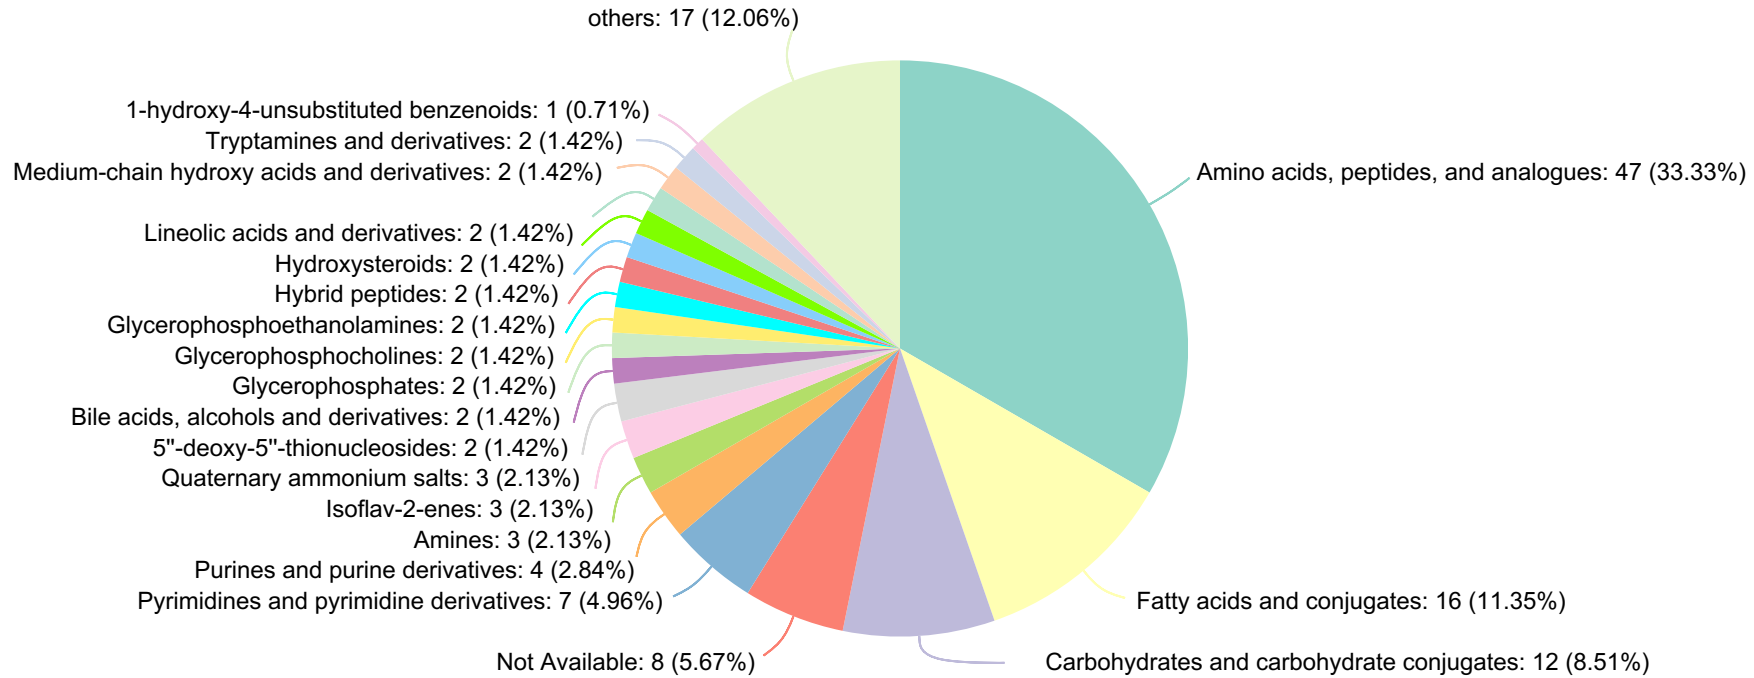

Supplement: f1 [file 3992753.f1.zip]
